# Supplementary material for: The influence of obesity-related factors in the etiology of renal cell carcinoma—A mendelian randomization study
Source: PLOS journal article supplement (doi:10.1371/journal.pmed.1002724), 2019-01-03
Supplement: S2 (10.1371/journal.pmed.1002724.s002) [file journal.pmed.1002724.s002]

**S2 Table- Description of the studies participating in the RCC GWAS meta-analysis.**

| Study Name (Abbreviation)                                               | Design;<br>location                       | Study Population                                                                                                                                                                                                                                                                                                                                   | Cases (n)   | Controls (n) | Genotyping<br>Array |
|-------------------------------------------------------------------------|-------------------------------------------|----------------------------------------------------------------------------------------------------------------------------------------------------------------------------------------------------------------------------------------------------------------------------------------------------------------------------------------------------|-------------|--------------|---------------------|
| <b>IARC scan</b>                                                        |                                           |                                                                                                                                                                                                                                                                                                                                                    | <b>5219</b> | <b>8010</b>  |                     |
| The European Prospective Investigation into Cancer and Nutrition (EPIC) | Prospective cohort, 10 European countries | Adults aged 35-74 enrolled between 1992 and 2000 (n=521,468), Incident cancers identified through health insurance records, cancer and pathology registries and active follow-up (subjects and next of kin); Genomic DNA extracted from buffy coat                                                                                                 | 402         | 551          | Omni5/610Q /550K    |
| CeRePP                                                                  | Case series; France                       | Pathologically confirmed RCC recruited through the CeRePP network; Controls recruited from a systematic urologic screening program, which includes men or women who had no history or symptoms of kidney disease with a normal morphologic status of kidneys at ultrasonographic examination. Genomic DNA extracted from blood and saliva samples. | 460         | 568          | Omni5/610Q /317K    |
| Umea                                                                    | Prospective cohort, Sweden                | Population-based cohort, recruiting since 1985; resident from the Västerbotten county in northern Sweden. Incident cases identified through linkage to national death and cancer registries. Genomic DNA extracted from blood                                                                                                                      | 297         | 301          | Omni5               |
| Karolinska                                                              | 2 prospective cohorts; Sweden             | COSM: Cohort of Swedish Men (45,306 men enrolled in 1997) and SMC: Swedish Mammography Cohort (61,433 women enrolled between 1987 and 1990), in central Sweden. Incident cases identified through linkage to national death and cancer registries. Genomic DNA extracted from saliva.                                                              | 131         | 295          | Omni5               |

|                                                                                                              |                                                          |                                                                                                                                                                                                                                                                                                          |      |      |                    |
|--------------------------------------------------------------------------------------------------------------|----------------------------------------------------------|----------------------------------------------------------------------------------------------------------------------------------------------------------------------------------------------------------------------------------------------------------------------------------------------------------|------|------|--------------------|
| Consortium For the Investigation of Renal Malignancies / Melbourne Collaborative Cohort Study (ConFIRM/MCCS) | Case-control and cohort studies; Australia               | Incident cases diagnosed in Victoria and Queensland in the period 2011-2014 and aged 18-74 years (ConFIRM), and from within the MCCS when fresh blood collected; Controls selected from healthy participants in the MCCS cohort; Genomic DNA extracted from whole blood (ConFIRM) and buffy coat (MCCS). | 184  | 396  | Omni5              |
| The IARC K2 study                                                                                            | Case-control study; 4 central/eastern European countries | Multicentric study conducted in 2007-2013 in Russia, Czech Republic, Romania, and Serbia. Hospital or population-based controls depending on recruiting centers.                                                                                                                                         | 1640 | 1388 | Omni5/Omni Express |
| The Nord-Trondelag Health (HUNT2) and Tromso Studies (Tromso IV)                                             | 2 prospective cohorts; Norway                            | HUNT2: Adults aged 20+ enrolled between 1995 and 1997 (N=65,285); Tromso IV: Adults aged 25+ enrolled between 1994-1995 (N=27,158); Cases identified through Norwegian Cancer Registries; Genomic DNA extracted from buffy coat.                                                                         | 133  | 388  | 610Q/317K          |
| The NCI/IARC study in central Europe (CE)                                                                    | Case-control study; 4 European countries                 | Hostipatl based study conducted between 1999-2003 (except Poland) 2004-2007 (Poland). Controls matched to lung cancer and included in previous GWAS of lung cancer; Genomic DNA extracted from buffy coat and RBC.                                                                                       | 1096 | 2058 | 317K               |
| Arsenic Health Risk Assessment and Molecular Epidemiology study in Central Europe (ASHRAM)                   | Case-control study; Slovakia and Hungary                 | Cases recruited in 6 counties between 2002-2004; Controls matched to lung cancer and included in previous GWAS of lung cancer: Genomic DNA extracted from whole blood.                                                                                                                                   | 84   | 399  | 610Q/317K          |
| The Leeds cohort                                                                                             | Case series; UK                                          | RCC from the Leeds cohort recruited between 1998-2007; Genomic DNA extracted from blood                                                                                                                                                                                                                  | 348  | -    | 610Q               |
| SEARCH Kidney cancer study (SEARCH)                                                                          | Case series; UK                                          | Population based case series including all patients with a kidney cancer aged 70- and diagnosed between 2002-2006; Genomic DNA extracted from blood.                                                                                                                                                     | 181  | -    | 610Q               |

|                                                                              |                                                |                                                                                                                                                                                                                                                       |             |             |                                         |
|------------------------------------------------------------------------------|------------------------------------------------|-------------------------------------------------------------------------------------------------------------------------------------------------------------------------------------------------------------------------------------------------------|-------------|-------------|-----------------------------------------|
| WTCCC                                                                        | Controls; UK                                   | Dataset generated by the Wellcome Trust Sanger Institute in collaboration with the 1958 Birth cohort; Genomic DNA extracted from blood                                                                                                                | -           | 1361        | 550K                                    |
| Moscow                                                                       | Case-control study; Moscow                     | Incident cases were recruited between 2007-2009. Hospital based controls were match and recruited during same period; Genomic DNA extracted from blood                                                                                                | 263         | 305         | 610Q                                    |
| <b>NCI scan</b>                                                              |                                                |                                                                                                                                                                                                                                                       | <b>3728</b> | <b>7816</b> |                                         |
| Agricultural Health Study (AHS)                                              | Prospective cohort; USA (Iowa, North Carolina) | Private and commercial pesticide applicators and spouses of private applicators, enrolled between 1993 and 1997 (n=89,655). Incident cancer identified through linkage with state cancer registries. Germline DNA extracted from buccal cell samples. | 7           | -           | Omni Express                            |
| Alpha-Tocopherol, Beta-Carotene Cancer Prevention Study (ATBC)               | Prospective cohort /randomized trial; Finland  | Male smokers aged 50-69 at entry, enrolled between 1985 and 1988 (n=29,133). Incident cancers identified through linked to Finnish Cancer Registry. Germline DNA extracted from whole blood samples.                                                  | 202         | 1509        | Omni Express/<br>Omni2.5/<br>660W/ 610K |
| BioVU                                                                        | Hospital biorepository ; USA (Nashville)       | Renal cancer patients treated at Vanderbilt University Medical Center between 2006 and 2012. Controls selected from among patients admitted for non-cancer condition, frequency matched by age and sex.                                               | 629         | 207         | Omni Express                            |
| American Cancer Society Cancer Prevention Study II Nutrition Cohort (CPS-II) | Prospective cohort; USA                        | Men and women aged 50-74 at entry, enrolled between 1992 and 1993 (n=184,194). Incident cancers identified from biannual follow-up questionnaires or linkage with state cancer registries. Germline DNA extracted from blood and buccal cell samples. | 272         | 942         | Omni Express/<br>Omni2.5/<br>660W/ 610K |
| Dana-Farber/Harvard Cancer Center (DFHCC)                                    | Case series: USA (Boston)                      | Patients with localized renal cancer treated at DFHCC between 2002 and 2010. Genomic DNA extracted from blood samples.                                                                                                                                | 206         | -           | Omni Express                            |

|                                                                      |                                                  |                                                                                                                                                                                                                                                                                                                                                                                                                                            |     |       |                                                  |
|----------------------------------------------------------------------|--------------------------------------------------|--------------------------------------------------------------------------------------------------------------------------------------------------------------------------------------------------------------------------------------------------------------------------------------------------------------------------------------------------------------------------------------------------------------------------------------------|-----|-------|--------------------------------------------------|
| Health Professionals Follow-up Study (HPFS)                          | Prospective cohort; USA                          | Men in selected health professions, enrolled in 1986 (n=51,529). Incident cancers identified from follow-up questionnaires and subsequent medical record review. Germline DNA extracted from blood samples.                                                                                                                                                                                                                                | 38  | 86    | Omni Express                                     |
| Nurses' Health Study (NHS)                                           | Prospective cohort; USA                          | Female registered nurses aged 30-55, enrolled in 1976 (n=121,700). Incident cancers identified by mailed follow-up questionnaire and subsequent medical record review. Germline DNA extracted from blood samples.                                                                                                                                                                                                                          | 57  | 434   | Omni Express                                     |
| Physicians Health Study (PHS)                                        | Prospective cohort / randomized trial; USA       | Male physicians aged 50+ enrolled between 1982 and 1984 (n=22,071). Incident cancers identified by mailed follow-up questionnaire. Germline DNA extracted from blood samples.                                                                                                                                                                                                                                                              | 21  | -     | Omni Express                                     |
| Prostate, Lung, Colorectal and Ovarian Cancer Screening Trial (PLCO) | Prospective cohort / cancer screening trial; USA | Men and women aged 55-74 at entry, enrolled between 1993 and 2001 (n=155,000). Incident cancers identified from annual questionnaires, with confirmation through medical records. Germline DNA extracted from blood and buccal cell samples.                                                                                                                                                                                               | 377 | 3,848 | Omni Express/<br>Omni2.5/<br>660W/ 610K/<br>550K |
| National Cancer Institute U.S. Kidney Cancer Study (USKC)            | Case-control; USA (Chicago, Detroit)             | Cases: 1227 men and women aged 20-79 at diagnoses, identified from Chicago hospital records and Metropolitan Detroit Cancer Surveillance System between 2003 and 2007. Controls: 1235 men and women recruited from the state Department of Motor Vehicle records (ages 30-64) and Medicare beneficiary records (ages 65+), frequency matched to cases on age, race, sex, region. Genomic DNA extracted from blood and buccal cell samples. | 662 | 561   | 610K                                             |
| Van Andel Research Institute (VARI)                                  | Case series; USA                                 | Renal cancer patients treated at Spectrum Health Hospital in Grand Rapids, MI, and in hospitals affiliated with the Cooperative Human Tissue Network (CHTN). Germline DNA extracted from adjacent normal kidney tissue.                                                                                                                                                                                                                    | 920 | -     | Omni Express                                     |
| Vitamins and Lifestyle Study (VITAL)                                 | Prospective cohort; USA (Washington State)       | Men and women aged 50-76, enrolled between 2000 and 2002. Incident cancers identified by linkage to the western Washington SEER cancer registry. Germline DNA extracted from buccal cell free samples                                                                                                                                                                                                                                      | 91  | -     | Omni Express                                     |

|                                 |                                              |                                                                                                                                                                                                                                                                                                                                                                                                         |     |      |                               |
|---------------------------------|----------------------------------------------|---------------------------------------------------------------------------------------------------------------------------------------------------------------------------------------------------------------------------------------------------------------------------------------------------------------------------------------------------------------------------------------------------------|-----|------|-------------------------------|
| Women's Health Initiative (WHI) | Prospective cohort/<br>randomized trial; USA | Women aged 50-79, enrolled between 1993 and 1998. Incident cancers were identified by mailed follow-up questionnaires, and verified by medical records. Genomic DNA extracted from buffy coat samples.                                                                                                                                                                                                  | 239 | 229  | Omni Express                  |
| Women's Health Study (WHS)      | Prospective cohort/<br>randomized trial; USA | Female health professionals aged 45 years or older, enrolled in 1993. Incident cancers identified by mailed follow-up questionnaire. Genomic DNA extracted from blood samples.                                                                                                                                                                                                                          | 7   | -    | Omni Express                  |
| MD Anderson scan                | Case-control;<br>USA (Texas)                 | Cases: 894 Caucasian men and women treated for renal cancer at the University of Texas MD Anderson Cancer Center. Controls: 556 Caucasian men and women identified through random-digit dialing. Genomic DNA extracted from blood samples.                                                                                                                                                              | 893 | 556  | 660W                          |
| UK scan                         | Case series;<br>UK                           | Cases: adult renal cancer patients identified from UK clinical oncology centers and the institute of Cancer Research and Royal Marsden NHS Hospitals Trust. Controls: previously genotyped samples from the Wellcome Trust Case Control Consortium 2 1958 birth cohort and UK Blood Service Control Group (WTCC controls included in the IARC scan excluded). Genomic DNA extracted from blood samples. | 944 | 4024 | Omni Express/<br>Hap 1.2M Duo |
